# Global Patterns in Culturable Soil Yeast Diversity

Himeshi Samarasinghe<sup>1</sup>, Yi Lu<sup>1</sup>, Renad Aljohani<sup>1,2</sup>, Ahmad Al-Amad<sup>1</sup>, Heather Yoell<sup>1</sup> and  
Jianping Xu<sup>1\*</sup>

<sup>1</sup>Department of Biology, McMaster University, Hamilton, Canada ([samaraya@mcmaster.ca](mailto:samaraya@mcmaster.ca);  
[luy129@mcmaster.ca](mailto:luy129@mcmaster.ca); [alamadae@mcmaster.ca](mailto:alamadae@mcmaster.ca); [yoellh@mcmaster.ca](mailto:yoellh@mcmaster.ca); [jpxu@mcmaster.ca](mailto:jpxu@mcmaster.ca))

<sup>2</sup>Current Address: Department of Infectious Diseases, South Kensington Campus, Imperial  
College London, UK ([r.aljohani20@imperial.ac.uk](mailto:r.aljohani20@imperial.ac.uk))

\*Corresponding author

## Summary

Yeasts, broadly defined as unicellular fungi, fulfill essential roles in soil ecosystems as decomposers and nutrition sources for fellow soil-dwellers. Broad-scale investigations of soil yeasts pose a methodological challenge as metagenomics are of limited use on this group of fungi. Here we characterize global soil yeast diversity using fungal DNA barcoding on 1473 yeasts cultured from 3826 soil samples obtained from nine countries in six continents. We identify mean annual precipitation and international air travel as two significant predictors of soil yeast community structure and composition worldwide. Anthropogenic influences on soil yeast communities, directly via travel and indirectly via altered rainfall patterns resulting from climate change, are concerning as we found common infectious yeasts frequently distributed in soil in several countries. Our discovery of 41 putative novel species highlights the need to revise the current estimate of ~1500 recognized yeast species. Our findings demonstrate the continued need for culture-based studies to advance our knowledge of environmental yeast diversity.

**Keywords:** fungal diversity; culturable yeasts; *Candida*; *Cryptococcus*; gene flow; international travel

**Subject area:** Biodiversity and Ecology

## 32 1. Introduction

33 Soil is host to an incredible amount of microbial life, with each gram containing over  
34 10 billion cells of bacteria, archaea and fungi (Roesch et al., 2007). Despite their  
35 relatively low abundance, soil fungi fulfill essential roles in decomposition of organic  
36 material, nutrient cycling and soil fertilization (Frac et al., 2018). This is especially true  
37 for yeasts, broadly defined as unicellular fungi, whose numbers rarely exceed  
38 thousands of cells per gram of soil. Yet, yeasts in soil ecosystems are essential  
39 decomposers and nutrient sources for fellow soil-dwelling protists, bacteria, insects,  
40 and nematodes (Botha, 2011; Yurkov, 2018). In fact, yeasts may be the predominant  
41 soil fungi in cold biospheres such as continental Antarctica (Connell et al., 2008;  
42 Vishniac, 1996). Soil is also a primary reservoir for common pathogenic yeasts of the  
43 *Candida* and *Cryptococcus* genera that frequently cause superficial and systemic  
44 infections in humans (Kurtzman et al., 2011).

45 It is becoming increasingly apparent that the true extent of global soil yeast diversity  
46 is significantly underestimated. While yeast cells were first observed under the  
47 microscope in 1680 by Anton Van Leeuwenhoek, their natural habitats were a topic of  
48 contention among mycologists who often associated yeasts with fruit trees and  
49 fermentation. It was not until the 1950s that soil was established as a true natural  
50 habitat of yeasts where they live and reproduce. The culturing media, incubation  
51 temperatures and techniques used in pioneering studies were expanded in later  
52 projects to isolate soil yeasts of diverse metabolic and functional profiles (reviewed in  
53 Yurkov, 2018). Currently, the diverse array of yeasts recovered and characterized from  
54 soils across the globe contribute to the ~1500 recognized yeast species on the planet  
55 (Kurtzman et al., 2011). Environmental surveys of yeasts routinely uncover novel  
56 species, accounting for as much as 30% of yeast populations, highlighting the need to  
57 revise current estimates of global yeast diversity (Groenewald et al., 2018; Yurkov et  
58 al., 2016b, 2016a).

59 Lack of adequate environmental sampling, especially in Asia, Africa, South and Central  
60 America, limits the discovery of novel yeast species, characterization of soil yeast  
61 communities, and prediction of global diversity patterns. Soil yeast populations often  
62 differ in structure and composition between locations. With the exception of a few  
63 genera that are widespread in soil such as *Cyberlindnera*, *Schwanniomyces*,  
64 *Naganishia*, *Goffeauzyma* and *Solicoctozyma* (Botha, 2011), most yeast species have a  
65 fragmented distribution with few shared species between sites, even within the same  
66 geographical region. One study found that only eight of the 57 species found in soils  
67 of Mediterranean xerophyl forests were shared between the three sampling plots in  
68 the same locality (Yurkov et al., 2016a). Another study found only a single species to  
69 be present in all three sampled temperate forests in Germany (Yurkov et al., 2012). So  
70 far, most environmental surveys reported in the literature have been ecologically/

71 geographically limited, with sampling often focus on a specific ecological niche within  
72 a single locality, region, or country (Into et al., 2020; Li et al., 2020; Monteiro Moreira  
73 and Martins do Vale, 2020; Tepeevea et al., 2018).

74 Factors affecting soil yeast diversity have not been fully elucidated but soil moisture,  
75 soil pH, carbon content and nitrogen content have been implicated as contributing  
76 variables (reviewed in Botha, 2011). In 2006, Vishniac analyzed prominent yeast species  
77 in soil along a latitudinal gradient and found that mean annual temperature, mean  
78 annual rainfall and electrical conductivity explained ~44% of the variation in yeast  
79 species distributions (Vishniac, 2006). As their sampling locations were limited to the  
80 Americas and Antarctica, it is unknown whether the same trends persist on a global  
81 scale. One potential contributing factor to yeast species and genotype distributions is  
82 anthropogenic influences such as international travel. For example, international travel  
83 has increased exponentially in the last few decades with direct implications for the  
84 global spread of organisms, most notably infectious disease agents and invasive  
85 species. The role of global travel in introducing infectious diseases to new areas and  
86 facilitating epidemics is well documented (Findlater and Bogoch, 2018), with the  
87 current COVID-19 pandemic being a prime example. International travel is likely  
88 affecting soil yeast communities by transferring previously geographically isolated  
89 species and genotypes across borders, although a link between the two has not been  
90 previously investigated.

91 Metagenomics is widely applied in the study of environmental microbes to investigate  
92 taxonomic diversity, characterize functional groups, and elucidate broad scale patterns  
93 (Abbasian et al., 2016; Abia et al., 2018; Egidi et al., 2019; Li and Qin, 2005). However,  
94 metagenomics and other culture-independent methods cannot be readily applied to  
95 the study of yeasts due to the lack of a suitable yeast-specific barcoding gene (Xu,  
96 2016). Yeasts are phylogenetically diverse and occur among filamentous fungi in two  
97 major phyla, Ascomycota and Basidiomycota, within the fungal kingdom. In a 2014  
98 study that has not been surpassed in scale before or since, Tedersoo and colleagues  
99 used high throughput sequencing of fungal barcoding DNA to assess global soil fungal  
100 diversity and identify predictors of global diversity patterns (Tedersoo et al., 2014). Due  
101 to the lack of a sequence-based signature, yeasts were not singled out as a group of  
102 interest and thus limited information was presented on soil yeast diversity of the 39  
103 countries included in the study. They identified mean annual precipitation and distance  
104 from equator as the two strongest overall predictors of soil fungal diversity on a global  
105 scale. It is not clear if and to what extent the same predictors apply to yeast diversity  
106 in soil.

107 Using a global collection of 3826 soil samples, here we assessed the culturable soil  
108 yeast diversity in nine countries representing all continents except Antarctica. We  
109 found soil yeast populations of each country to be unique in structure and composition

110 as 73% of the discovered species were not shared between countries. Mean annual  
111 precipitation was the most significant predictor of culturable soil yeast diversity on a  
112 global scale. We found air traffic volume to be significantly correlated with the number  
113 of shared species between countries, implying a link between international travel and  
114 transfer of yeast species across borders. Our study overcomes the geographical  
115 constraints of many previous studies by identifying soil yeast diversity patterns on a  
116 global scale. We also demonstrate that culture-dependent methods provide a more  
117 comprehensive framework than metagenomics for studying phylogenetically diverse,  
118 but morphologically targeted groups of organisms such as yeasts.

## 119 2. Materials and Methods

### 120 2.1 Soil collection

121 We collected soil from 53 locations in nine countries encompassing all continents  
122 except Antarctica (Figure 1 and Supplementary Table 1). At each location, bags (3cm x  
123 7cm sterile, resealable, polyethylene bags) of topsoil, within 1-3 inches from the  
124 surface, were collected following sterile protocols and transported to our lab at  
125 McMaster University, Canada. Each bag contained soil from 10 sites in the same area  
126 but located at least 2m from each other. Different bags represented soils from at least  
127 100m from each other. The soil in each bag was segregated into ~1g aliquots and  
128 stored at 4°C. In total, this study included 3826 soil samples originating from the  
129 following countries: Cameroon (493), Canada (300), China (340), Costa Rica (388),  
130 France (327), Iceland (316), New Zealand (610), Peru (490) and Saudi Arabia (562).

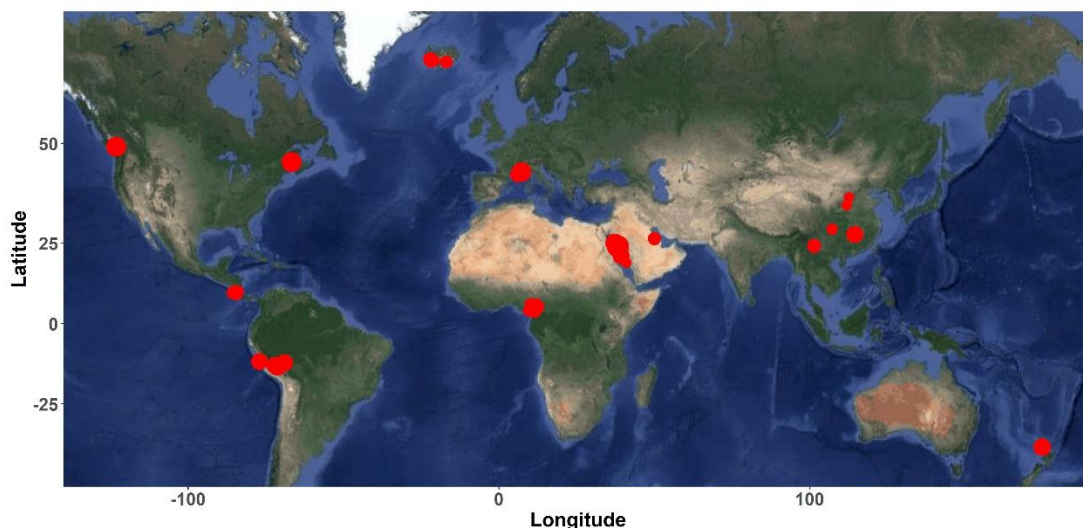

131

132 **Figure 1: Soil sampling locations.** Soil was collected from 53 locations, indicated by the  
133 red circles, in nine countries. The size of the circle corresponds to the number of  
134 samples obtained from that location.

## 135 *2.2 Yeast isolation from soil samples*

136 Yeasts were isolated at a temperature deemed to be optimal based on the country of  
137 origin's mean annual temperature. For each soil sample, approximately 0.1g was added  
138 into 5ml of YEPD broth (Yeast Extract-Peptone-Dextrose) in 13ml culture tubes and  
139 incubated in a roller drum for 24 hours. The broth contained the antibiotic  
140 chloramphenicol (50mg/L) and the selectively toxic fungicide benomyl (5mg/L) to  
141 inhibit bacterial and mold growth, respectively. We extended this incubation step to  
142 72 hours for soil samples from Iceland due to slower yeast growth at 14°C. We then  
143 plated 100ul of the broth onto solid YEPD containing chloramphenicol and benomyl  
144 and incubated at the same temperature for an additional 2-5 days until microbial  
145 growth was visible. For each plate that contained morphologically yeast-like colonies,  
146 we randomly selected a representative colony and streaked it onto fresh YEPD plates  
147 to obtain single colonies. If more than one morphology was present, one  
148 representative colony of each type was separately streaked for single colonies. After  
149 2-3 days' incubation, we randomly picked one single colony per yeast isolate and  
150 suspended in 50ul nuclease-free water to be used in Polymerase Chain Reaction (PCR).

## 151 *2.3 Yeast identification via ITS sequencing*

152 We identified the yeasts by sequencing their fungal barcoding gene, the ribosomal  
153 Internal Transcribed Spacer (ITS) regions. We performed colony PCR using primers ITS1  
154 (5' TCCGTAGGTGAACCTGCGG 3') and ITS4 (5' TCCTCCGCTTATTGATATGC 3') to  
155 amplify the ITS region. The PCR cocktail consisted of 10ul Promega GoTaq Green  
156 Mastermix, 5ul nuclease-free water, 2ul each of the primers (2uM) and 1ul cell  
157 suspension. The thermocycling conditions were an initial denaturation step at 95°C for  
158 10 minutes followed by 35 cycles of (i) 95°C for 30 seconds, (ii) 55°C for 30 seconds  
159 and iii) 72°C for 1 minute. We ran 4ul of the PCR products on a 1.5% agarose gel to  
160 check for successful amplification. The remaining PCR products were Sanger  
161 sequenced with the ITS1 primer at Eurofins Genomics in Louisville, Kentucky  
162 (<https://eurofinsgenomics.com/en/home/>). We trimmed the low-quality ends of the  
163 ABI chromatograms generated from Sanger sequencing and batch converted to FASTA  
164 format with DNA Baser's ABI to FASTA converter software  
165 ([https://www.dnabaser.com/download/Abi-to-Fasta-converter/abi-to-fasta-](https://www.dnabaser.com/download/Abi-to-Fasta-converter/abi-to-fasta-converter.html)  
166 [converter.html](https://www.dnabaser.com/download/Abi-to-Fasta-converter/abi-to-fasta-converter.html)). We used BLAST+ applications on the command line to query the  
167 multi-FASTA file against the NCBI nucleotide database to detect sequence similarity to  
168 existing ITS sequences. The BLAST searches were run remotely (-remote flag) to avoid  
169 downloading the entire database onto our servers. The output was compiled into a  
170 CSV (Comma Separated Values) file containing the top 10 matches for each query  
171 sequence. We inspected the CSV file manually to check for quality and for any  
172 inconsistencies in species identity within the top ten matches. The putatively identified  
173 species through GenBank searches were further confirmed by manually comparing to

174 sequences in the curated UNITE database (<https://unite.ut.ee/>). We assigned species  
175 identities to our ITS sequences at a sequence similarity threshold of 98.41% to existing  
176 sequences in databases. This threshold was previously determined to be optimum to  
177 distinguish yeast species at the ITS locus based on an analysis of 9000 fungal  
178 sequences (Vu et al., 2016). Sequences with no matches surpassing this threshold were  
179 considered putative novel species.

#### 180 ***2.4 Statistical analyses of population diversity***

181 All statistical analyses were conducted in RStudio v.4.0.2 using a combination of base  
182 functions and packages including ggmap (Kahle and Wickham, 2013), ggplot2  
183 (Wickham, 2016), and tidyverse (Wickham et al., 2019). We quantified the diversity of  
184 yeast populations at our sampling sites by calculating the Shannon diversity index  
185 using the package Vegan v.2.5-7 (Oksanen et al., 2020). We conducted rarefaction  
186 analyses using the iNEXT package (Hsieh et al., 2016) to determine if sufficient soil  
187 sampling was performed in each of the nine countries to accurately estimate their  
188 culturable soil yeast diversity.

#### 189 ***2.5 Relationship between yeast diversity and climate and geographic factors***

190 Within each country, soil collection sites differed in climatic and environmental  
191 conditions, with the exception of New Zealand where sampling was limited to the  
192 metropolitan region of Auckland. We assigned the 53 sampling sites to 47 distinct  
193 locations based on their geographical coordinates. Using geographical coordinates,  
194 we calculated mean annual precipitation and mean annual temperature by averaging  
195 monthly data over a 16-year period from 1991-2016, available on Climate Change  
196 Knowledge Portal (<https://climateknowledgeportal.worldbank.org/>). We calculated the  
197 elevation and distance from the sampling sites to the equator using Google Maps. We  
198 calculated the Shannon diversity index of the yeast populations found at the 47 distinct  
199 locations. We constructed mixed models using the package lme4 v.1.1-26 (Bates et al.,  
200 2015) where precipitation, temperature, elevation, and distance to equator were set as  
201 fixed effects, country was fitted as a random effect and Shannon diversity Index was  
202 fitted as the dependent variable.

#### 203 ***2.6 Air traffic data***

204 We extracted data on the number of flights occurring between each country-country  
205 pair over a 5-year period from 2011-2016 from the Global Transnational Mobility  
206 Dataset (Recchi et al., 2019). This dataset is compiled based on a combination of  
207 tourism data and distance-adjusted air-traffic data. Next, we calculated the number of  
208 yeast species shared between each country-country combination. To assess the  
209 correlation between the number of shared species and the volume of air traffic  
210 between countries, a linear model was fitted between the two variables.

## 211 *2.7 Comparison to metagenomics study*

212 We compared our findings to a previous study that used culture-independent methods  
213 to investigate global diversity of soil fungi. In 2014, Tedersoo and colleagues extracted  
214 DNA directly from soil samples of 39 countries and performed high throughput  
215 sequencing of the ITS2 region using primers ITS3 and ITS4 (Tedersoo et al., 2014),  
216 covering a portion of the DNA barcoding fragment we sequenced here. Four countries  
217 overlapped between the two studies, namely, Cameroon, Canada, China and New  
218 Zealand. For each of the four countries, we performed BLAST searches using BLAST+  
219 applications on the command line to identify ITS sequences that appeared in both  
220 studies. First, we created custom databases containing our ITS sequences for each  
221 country. Next, the ITS sequences for the countries of interest were extracted from  
222 Supplementary data table 1 of Tedersoo et al.'s paper and converted to FASTA format.  
223 The multi-FASTA file for each country was then queried against its respective custom  
224 database using the blastn option. The output was compiled into a CSV file containing  
225 the top 5 matches for each query sequence. This CSV file was perused manually to  
226 identify significant sequence similarity between query and match sequences.

## 227 **Results**

228

### 229 *3.1 Yeast isolation and species identification*

230 We isolated a total of 1473 yeasts from 3826 soil samples (Table 1). The isolation rate  
231 varied among the countries, ranging from 17% in Saudi Arabia to 87% in Canada. The  
232 yeast isolation and species distribution data from Cameroon soils have been reported  
233 in a previous study (Aljohani et al. 2018). Overall, we observed a slightly negative  
234 correlation between the number of soil samples and the yeast isolation rate ( $p < 0.05$ ),  
235 as countries with more soil samples did not necessarily yield more yeast isolates.

236 We successfully assigned species identity to 1367 isolates using the 98.41% sequence  
237 identity cut-off to homologous ITS sequences in NCBI and UNITE databases. These  
238 strains were categorized into 90 species belonging to 37 genera, with *Candida* being  
239 the most species-rich genus ( $n=19$  species). With 60 ascomycetes and 30  
240 basidiomycetes, both major yeast-containing phyla within the fungal kingdom were  
241 broadly represented. The 90 species belonged to six Classes, ten Orders and 18  
242 Families. However, two genera, *Nadsonia* and *Holtermanniella*, do not currently have  
243 defined Family associations (*incertae sedis*). The remaining 106 yeast strains can be  
244 grouped into 44 unique clusters at 98.41% nucleotide similarity. Since no existing  
245 sequences with  $>98.41\%$  ITS sequence identity were found in the databases, these 44  
246 clusters represent potentially novel yeast species. Genbank accession numbers to the  
247 ITS sequences of our 1473 isolates are MG817572 to MG817630 and MW894661 to  
248 MW896112 (Supplementary dataset 1).

249 Our rarefaction analyses suggested that sufficient soil sampling was conducted in each  
250 country to accurately estimate the true diversity of culturable soil yeasts. Projections  
251 for Shannon diversity index beyond the number of soil samples included in the study  
252 revealed that the diversity of our yeast populations approached saturation asymptote  
253 (Supplementary Figure 1). Additional sampling in these locations was not likely to have  
254 revealed higher yeast species diversity.

255 **Table 1: Summary statistics of yeast isolation from global soil samples**

| Country      | Number of soil samples | Number of yeast isolates | Number of known species | Number of novel species | Number of country-specific species | Shannon diversity index |
|--------------|------------------------|--------------------------|-------------------------|-------------------------|------------------------------------|-------------------------|
| Cameroon     | 493                    | 110                      | 10                      | 9                       | 12                                 | 2.17                    |
| Canada       | 300                    | 261                      | 34                      | 12                      | 25                                 | 3.06                    |
| China        | 340                    | 230                      | 23                      | 5                       | 15                                 | 2.54                    |
| Costa Rica   | 388                    | 95                       | 20                      | 2                       | 9                                  | 2.21                    |
| France       | 327                    | 175                      | 12                      | 2                       | 3                                  | 1.26                    |
| Iceland      | 316                    | 211                      | 11                      | 0                       | 4                                  | 1.25                    |
| New Zealand  | 610                    | 155                      | 14                      | 4                       | 5                                  | 2.05                    |
| Peru         | 490                    | 139                      | 30                      | 9                       | 20                                 | 3.27                    |
| Saudi Arabia | 562                    | 97                       | 8                       | 1                       | 5                                  | 0.91                    |
| <b>Total</b> | <b>3826</b>            | <b>1473</b>              | <b>90</b>               | <b>44</b>               | <b>98</b>                          |                         |

256

### 257 ***3.2 Diversity and abundance of culturable soil yeast populations***

258 The abundance and diversity of soil yeast populations varied significantly between  
259 countries. Saudi Arabia ranked lowest among the nine countries in the number of  
260 unique species, where 562 soil samples yielded 97 yeast isolates belonging to 9  
261 species, 1 of which was novel. On the other hand, we obtained 261 yeast isolates from  
262 300 Canadian soil samples, encompassing 46 species, 12 of which were novel. The  
263 number of yeast isolates and of distinct species found in the seven remaining countries  
264 ranged from 95-230 and 11-39 respectively (Table 1). The Shannon diversity index of  
265 the soil yeast populations ranged from 0.91 (Saudi Arabia) to 3.27 (Peru). Less diverse  
266 populations tended to be dominated by a single yeast species, most notably in France,  
267 Iceland, and Saudi Arabia where *Candida subhashii*, *Goffeauzyma gastrica* and  
268 *Cryptococcus deneoformans* predominated the soil yeasts respectively (Figure 2).

269



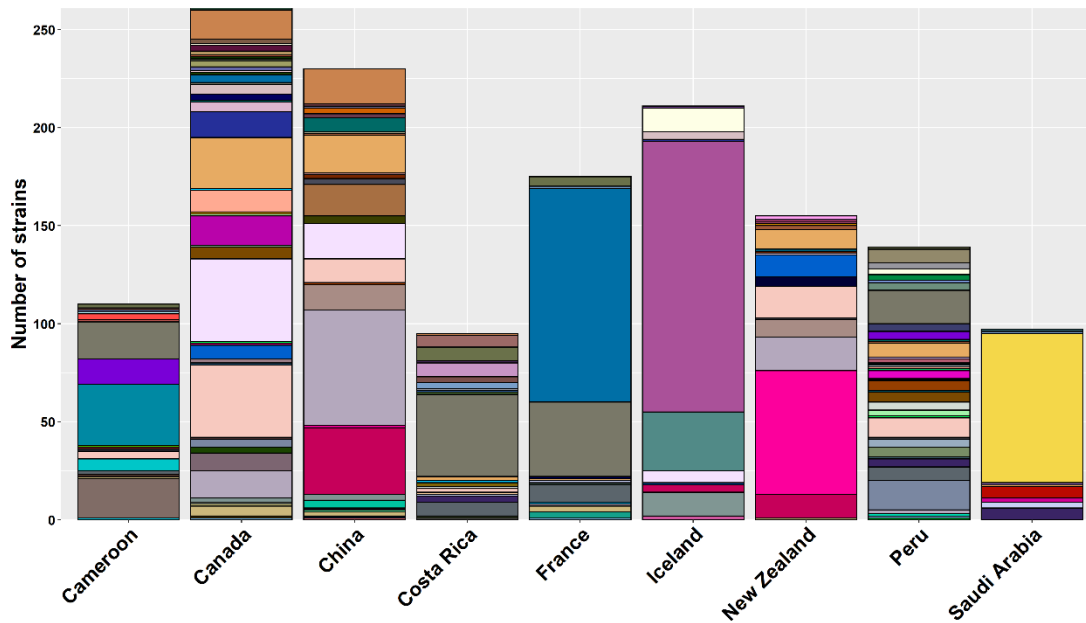

270

271 **Figure 2: Culturable soil yeast populations by country.** The X-axis represents the  
272 country. Each country is represented by a stacked bar plot. Each colour represents a  
273 unique species and the height of the colored sections indicate the abundance of that  
274 species.

275

### 276 3.2.1 Cameroon

277 As shown in the study by Aljohani et al. (2018) for the Cameroonian soil samples, all  
278 but one of the 19 yeast species recovered from Cameroonian soil were ascomycetes.  
279 The population was dominated by four species: *Cyberlindnera subsufficiens* (28%),  
280 *Torulaspota globosa* (18%), *Candida tropicalis* (17%) and *Cyberlindnera saturnus*  
281 (12%). Overall, Cameroonian soil contained the second highest number of novel  
282 species (n=9) after Canada (n=12).

### 283 3.2.2 Canada

284 The culturable yeast population in Canadian soil was dominated by ascomycetes (37  
285 species): the remaining 9 species were basidiomycetes. *Nadsonia starkeyi-henricii*, a  
286 little-known yeast that prefers relatively mild temperatures below 25°C, was the most  
287 abundant (16%) followed by the pathogenic *Papiliotrema laurentii* (14%).  
288 *Debaryomyces hansenii* (10%), *Barnettozyma californica* (6%) and a novel species (6%)  
289 were also present in significant amounts. Canadian soil contained 25 yeast species not  
290 found in soil samples of the other eight countries, including cold-adapted yeast  
291 *Cystofilobasidium ferigula*, industrial lactose fermenter *Kluyveromyces lactis*, and close  
292 relative of Baker's yeast, *Saccharomyces paradoxus*. Canada also had the highest  
293 number of novel species (n=12) of the 9 sampled countries.

### 294 3.2.3 China

295 The Chinese culturable soil yeast population consisted of similar numbers of  
296 ascomycetes and basidiomycetes (15 and 13 respectively). This population was  
297 dominated by strains of *Solicoccozyma aerea* and *Solicoccozyma terrea* that together  
298 accounted for 40% of the population. Other yeasts with significant prevalence included  
299 *Debaryomyces hansenii* (8%), *Barnettozyma californica* (8%), *Nadsonia starkeyi-*  
300 *henricii* (8%) and a novel species (7%). 15 yeast species were only found in the Chinese  
301 soil which also yielded five novel species.

### 302 3.2.4 Costa Rica

303 *Candida tropicalis* was the dominant species in the culturable soil yeast population of  
304 Costa Rica with a prevalence of 44%. The frequencies of the remaining 21 species  
305 ranged from 1%-7%. Ascomycetous species outnumbered basidiomycetes at 18 to  
306 four. Costa Rica was notable for being the only sampled country to contain strains of  
307 the common pathogenic yeasts *Candida albicans* (6%) and *Candida orthopsilosis* (3%).  
308 Strains of pathogenic *Candida parapsilosis* were also present in Costa Rican soil (3%).

### 309 3.2.5 France

310 The majority of species in the French culturable soil yeast population were  
311 ascomycetes (n=11) while three species were basidiomycetes. *Candida subhashii*, a  
312 pathogenic *Candida* species first identified in 2009 (Adam et al., 2009), was the  
313 dominant yeast in this population with an abundance of 62%. *C. subhashii* was  
314 previously determined to have strong antagonistic activity against filamentous fungi  
315 and has potential as a biocontrol agent against plant pathogenic fungi (Hilber-Bodmer  
316 et al., 2017). The widespread pathogen *Candida tropicalis* was the second most  
317 abundant species (22%), followed by *Saccharomyces cerevisiae* (5%). One strain of  
318 *Candida parapsilosis* was also detected in French soils.

### 319 3.2.6 Iceland

320 Of the 11 species isolated from Iceland soil, six were basidiomycetes and five were  
321 ascomycetes. With an abundance of 65%, *Goffeauzyma gastrica* was the dominant  
322 species in the Iceland culturable soil yeast population. *G. gastrica* is a cold-tolerant  
323 yeast commonly isolated from environmental sources in Antarctica and is known for  
324 its production of antifreeze proteins (Białkowska et al., 2017; Ogaki et al., 2020;  
325 Villarreal et al., 2018). *Goffeauzyma gilvescens*, another cold-tolerant yeast commonly  
326 found in Antarctica, was the second most abundant (14%), followed by *Candida sake*  
327 (6%) and *Solicoccozyma terricola* (6%). Iceland was the only sampled country to not  
328 yield any novel yeast species.

### 329 3.2.7 New Zealand

330 Basidiomycete species (n=10) were slightly more prevalent than ascomycete species  
331 (n=8) in the New Zealand culturable soil yeast population. *Solicoccozyma phenolica*  
332 was the most abundant species with a prevalence of 41%, followed by *Solicoccozyma*  
333 *aeria* (11%), *Papiliotrema laurentii* (10%) and *Solicoccozyma terrea* (8%). We isolated  
334 several species with industrial potential from New Zealand soil including *Papiliotrema*  
335 *terrestris*, shown to produce  $\beta$ -galactosidase that was safe for use in food  
336 production (Ke et al., 2018), and *Citeromyces matritensis*, an osmotolerant, ethanol-  
337 producing yeast shown to be capable of ethanol production from salted algae (Okai  
338 et al., 2017).

### 339 3.2.8 Peru

340 Peru's culturable soil yeast population, consisting of 39 species, ranked the highest  
341 among sampled countries in Shannon diversity index. This population was unique in  
342 structure and composition as it contained 20 species not found in any other sampled  
343 country, including often misidentified pathogen and crude palm oil assimilator  
344 *Candida palmioleophila* (Jensen and Arendrup, 2011; NAKASE et al., 1988), rare  
345 pathogen *Filobasidium magnum* (Aboutaleb et al., 2020), and halotolerant yeast  
346 used in azo dye decolorization *Pichia occidentalis* (Wang et al., 2020). This population  
347 contained significantly more ascomycete species (n=29) than basidiomycete species  
348 (n=10). Peruvian population was notable for its relative evenness with no single species  
349 exceeding 12% in abundance. *Candida tropicalis* was the most prevalent (12%),  
350 followed by *Schwanniomyces occidentalis* (11%) and *Papiliotrema laurentii* (7%).

### 351 3.2.9 Saudi Arabia

352 Saudi Arabian culturable soil yeast population was the least diverse of all sampled  
353 countries according to the Shannon diversity index. This population was notable for  
354 the overwhelming prevalence of the human pathogenic yeast, *Cryptococcus*  
355 *deneoformans* (78%), the causative agent of fatal fungal meningoencephalitis. The  
356 genotypes of *C. deneoformans* strains from Saudi Arabia have been reported in an  
357 earlier study (Samarasinghe et al., 2019). This study was the first to report the  
358 environmental presence of *C. deneoformans* in a desert climate. However, overall, the  
359 Saudi Arabian soil yeast population consisted of six basidiomycete species and three  
360 ascomycete species. One of the species was novel.

## 361 3.3 Pathogenic yeast species

362 According to the information presented in the latest edition of The Yeasts: A  
363 Taxonomic Study (Kurtzman et al., 2011), the following 12 species were the most  
364 common yeast pathogens of humans worldwide: *Candida albicans*, *Candida*  
365 *dubliniensis*, *Candida glabrata*, *Candida guilliermondii*, *Candida krusei*, *Candida*  
366 *lusitaniae*, *Candida parapsilosis*, *Candida orthopsilosis*, *Candida metapsilosis*, *Candida*

367 *tropicalis*, *Cryptococcus neoformans* and *Cryptococcus deneoformans*. We found 220  
368 strains belonging to eight of these species, accounting for 15% of all yeast isolates  
369 found in our samples (Figure 3). *C. tropicalis* was both the most abundant and most  
370 widespread with 117 isolates originating from Cameroon, Canada, Costa Rica, France  
371 and Peru. The 76 *C. deneoformans* isolates were exclusively found in Saudi Arabian  
372 soils. Additionally, seven *C. krusei* isolates were found in Costa Rica, six *C. albicans*  
373 isolates were found in Costa Rica, five *C. parapsilosis* isolates were found in Costa Rica,  
374 France and Saudi Arabia, four *C. lusitaniae* isolates were found in Canada and France,  
375 four *C. orthopsilosis* isolates were found in Cameroon and Costa Rica and a single *C.*  
376 *glabrata* isolate was found in Costa Rica. Common pathogenic yeasts were not isolated  
377 from our natural soils of China, Iceland and New Zealand.

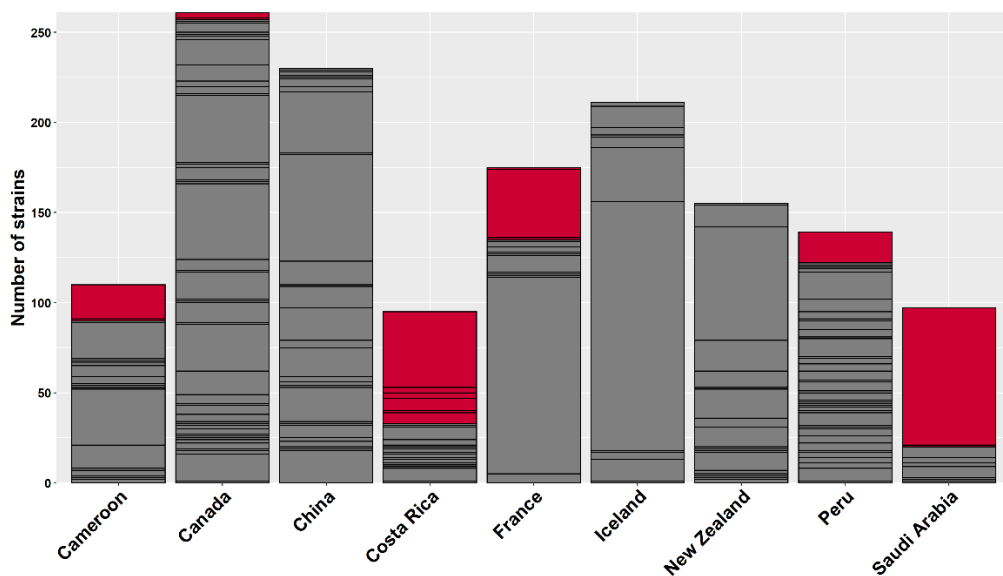

378

379 **Figure 3: Pathogenic yeast species and their abundance highlighted in red among**  
380 **countries.** In these stacked bar plots, the pathogenic species are highlighted in red.  
381 The height of the red sections indicates their abundance. Soils from China, Iceland and  
382 New Zealand did not yield any pathogenic species.

### 383 **3.4 Novel species**

384 Our yeast population included 44 potentially novel species from eight sampled  
385 countries: Our soil samples from Iceland did not yield any novel yeast species. We  
386 determined the most closely related genera for 41 species by running BLAST searches  
387 in Unite database (remaining three species' ITS sequences were too short for analysis).  
388 Our 41 novel species can be categorized into 12 genera (9 ascomycetes, 3  
389 basidiomycetes) with *Wickerhamomyces* containing ten novel species, and *Candida*  
390 containing eight. For each genus, we constructed maximum likelihood (ML) trees using  
391 RaxML with 1000 bootstraps (Stamatakis, 2014) to determine the taxonomic placement  
392 of novel species with respect to all known species of that genus. Our ML trees  
393 confirmed the separation of newly discovered species from known species: for an

394 example, the ML tree of *Wickerhamomyces* species places each novel species at its  
395 own distinct node (Figure 4). We observed some geographical clustering where the  
396 Cameroonian and Canadian novel species formed their own clusters: the two novel  
397 species of Costa Rica and Peru clustered together. The ML trees of the remaining 11  
398 genera can be found in Supplementary Dataset 1.

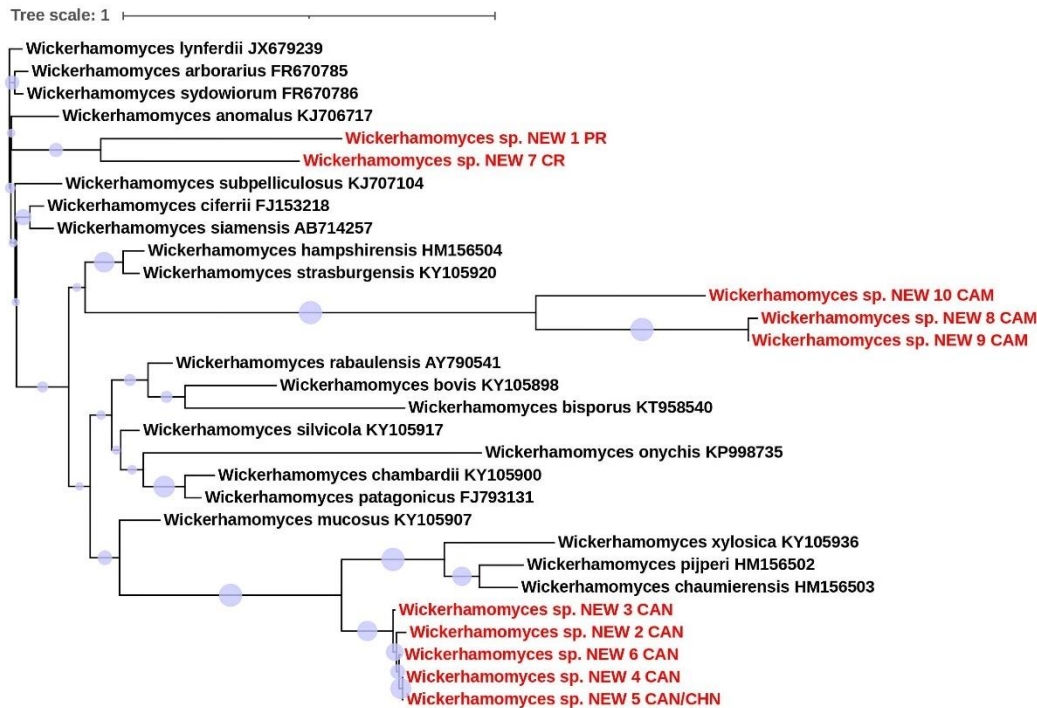

399

400 **Figure 4:** The maximum likelihood tree of *Wickerhamomyces* species. The placement  
401 of novel species with reference to known *Wickerhamomyces* species is shown. The  
402 novel species' country of origin is shown in the OTU labels where CAM = Cameroon,  
403 CAN = Canada and CHN = China. The tree was constructed using RaxML with 1000  
404 bootstraps.

### 405 *3.5 Predictors of global culturable soil yeast diversity*

406 Our 47 distinct sampling locations covered a wide range of global climatic conditions  
407 (Table 2) with mean annual precipitation ranging from 0mm (Lima, Peru where there  
408 is virtually no rainfall) to 2965mm (Monteverde, Costa Rica), while mean annual  
409 temperature ranged from -1.4°C (Svartifoss, Iceland) to 29.6°C (Alqunfudah, Saudi  
410 Arabia). Elevation ranged from < 2m (some sites in Svartifoss, Iceland and Auckland,  
411 New Zealand) to 4922km above sea level (Rainbow mountain, Peru). Mbandoumou in  
412 Cameroon was the closest to the equator (418.5km from equator) while Dimmuborgir  
413 in Iceland was the farthest (7280.5km from equator). Four locations, two in Saudi  
414 Arabia and two in Cameroon, were removed from further analysis as they did not yield  
415 any yeast isolates. The remaining 43 locations varied significantly in culturable yeast  
416 diversity as quantified by Shannon diversity index from 0 (only one species was found)

417 to 2.77 (Fredericton, Canada). According to our mixed model, we found mean annual  
 418 precipitation to be significantly correlated with the Shannon diversity index ( $p = 0.012$ ,  
 419 Figure 5). We found no significant correlation between the remaining predictors and  
 420 Shannon diversity index (Supplementary Dataset 3).

421 **Table 2: Environmental and geographic characteristics of sampling sites.** Mean annual rainfall, mean annual  
 422 temperature, distance to equator and elevation of sampling sites are summarized here.

| Country              | City                                      | Site code | Mean annual rainfall (mm) | Mean annual temperature (°C) | Distance to equator (km) | Altitude (km) |
|----------------------|-------------------------------------------|-----------|---------------------------|------------------------------|--------------------------|---------------|
| Cameroon             | Babanki                                   | CBB       | 1813.312                  | 1813.31                      | 20.75                    | 1173          |
|                      | Bambui                                    | CBM       | 1813.312                  | 1813.31                      | 20.75                    | 1274          |
|                      | Eloundem                                  | CEL       | 1617.423                  | 1617.42                      | 24.75                    | 620           |
|                      | Makepe                                    | CMK       | 2825.192                  | 2825.19                      | 26.83                    | 62            |
|                      | Mbalgon                                   | CML       | 1617.423                  | 1617.42                      | 25.03                    | 556           |
|                      | Mbandoumou                                | CMD       | 1617.423                  | 1617.42                      | 24.22                    | 719           |
|                      | Mbingo                                    | CMB       | 1813.312                  | 1813.31                      | 20.75                    | 1909          |
|                      | Njinikejum                                | CNJ       | 1813.312                  | 1813.31                      | 20.75                    | 1573          |
| Canada               | Simbock                                   | CSM       | 1617.423                  | 1617.42                      | 24.99                    | 643           |
|                      | Fredericton                               | CF        | 1267.842                  | 1267.84                      | 5.29                     | 10            |
| China                | Vancouver                                 | CV        | 1567.708                  | 1567.71                      | 9.95                     | 31            |
|                      | Ailao Mountain                            | CAC       | 1120.492                  | 1120.49                      | 17.29                    | 2782          |
| China                | Fenyi                                     | CC        | 1556.404                  | 1556.40                      | 17.26                    | 307           |
|                      | Jinfo Mountain                            | CJ        | 1154.85                   | 1154.85                      | 15.49                    | 2085          |
|                      | Panguangou Nature Reserve                 | CT        | 467.3346                  | 467.33                       | 9.66                     | 775           |
|                      | Taihang mountains west of Jincheng        | CSX       | 515.0269                  | 515.03                       | 12.11                    | 2012          |
|                      | El Jardin                                 | EJ        | 2308.358                  | 2308.36                      | 27.23                    | 152           |
| Costa Rica           | La Fotuna                                 | LF        | 2964.685                  | 2964.68                      | 25.51                    | 392           |
|                      | La Paz                                    | LP        | 2964.685                  | 2964.68                      | 25.51                    | 1512          |
|                      | Manuel Antonio                            | MA        | 2308.358                  | 2308.36                      | 27.23                    | 13            |
|                      | Monteverde                                | MV        | 2964.685                  | 2964.68                      | 25.51                    | 1585          |
|                      | Playa Hermosa                             | PH        | 2308.358                  | 2308.36                      | 27.23                    | 7             |
|                      | Playa Samara Beach                        | SB        | 1682.769                  | 1682.77                      | 26.72                    | 7             |
|                      | Poas Volcano                              | PV        | 2957.59                   | 2957.59                      | 25.51                    | 2350          |
|                      | Samara Town                               | ST        | 1682.769                  | 1682.77                      | 26.72                    | 13            |
|                      | Villas Playa Samara Beach Front Hotel     | SH        | 1682.769                  | 1682.77                      | 26.72                    | 7             |
|                      | France                                    | Hyerres   | FHF                       | 703.8039                     | 703.80                   | 15.45         |
| Uptown/Downtown Nice |                                           | FN        | 814.7077                  | 814.71                       | 13.82                    | 25            |
| Iceland              | Dimmuborgir above Myvatn lake (highlands) | ID        | 969.2692                  | 969.27                       | 1.06                     | 283           |
|                      | Landbrotalaug mini hotspring              | IL        | 823.4154                  | 823.42                       | 4.65                     | 11            |
|                      | National park near Svartifoss             | ISF       | 1904.319                  | 1904.32                      | -1.40                    | 192           |

|              |                                                             |     |          |         |       |      |
|--------------|-------------------------------------------------------------|-----|----------|---------|-------|------|
|              | Near Nautholsvik Geothermal Beach near Reykjavik university | IN  | 959.4077 |         |       | 0    |
|              | Skútustaðagígar pseudocraters on Myvatn lake                | ISP | 855.5423 | 959.41  | 4.17  | 271  |
|              | Thingvellir                                                 | IT  | 1107.946 | 855.54  | 1.93  | 89   |
| New Zealand  | Auckland                                                    | NZA | 1172.973 | 1107.95 | 3.05  | 0    |
|              |                                                             |     |          | 1172.97 | 15.13 | 0    |
| Peru         | Amazon                                                      | PA  | 2139.142 | 2139.14 | 25.51 | 176  |
|              | Cusco                                                       | PC  | 679.0462 | 679.05  | 9.59  | 3322 |
|              | Lima                                                        | PL  | 0        | 0.00    | 19.57 | 138  |
|              | Machu Pichu                                                 | PM  | 563.1885 | 563.19  | 9.50  | 1940 |
|              | Rainbow Mountain                                            | PR  | 725.7192 | 725.72  | 5.77  | 4922 |
|              | Sacred Valley                                               | PS  | 636.3077 | 636.31  | 8.52  | 2866 |
| Saudi Arabia | Alqunfudah                                                  | SAA | 49.56154 | 49.56   | 29.58 | 1    |
|              | Dammam                                                      | SAD | 73.69615 | 73.70   | 27.15 | 5    |
|              | Jeddah                                                      | SAJ | 45.29615 | 45.30   | 29.25 | 15   |
|              | Medina                                                      | SAM | 65.06154 | 65.06   | 27.18 | 636  |
|              | Umluj                                                       | SAU | 4.815385 | 4.82    | 27.63 | 14   |
|              | Yanbu                                                       | SAY | 29.56923 | 29.57   | 27.69 | 9    |

423

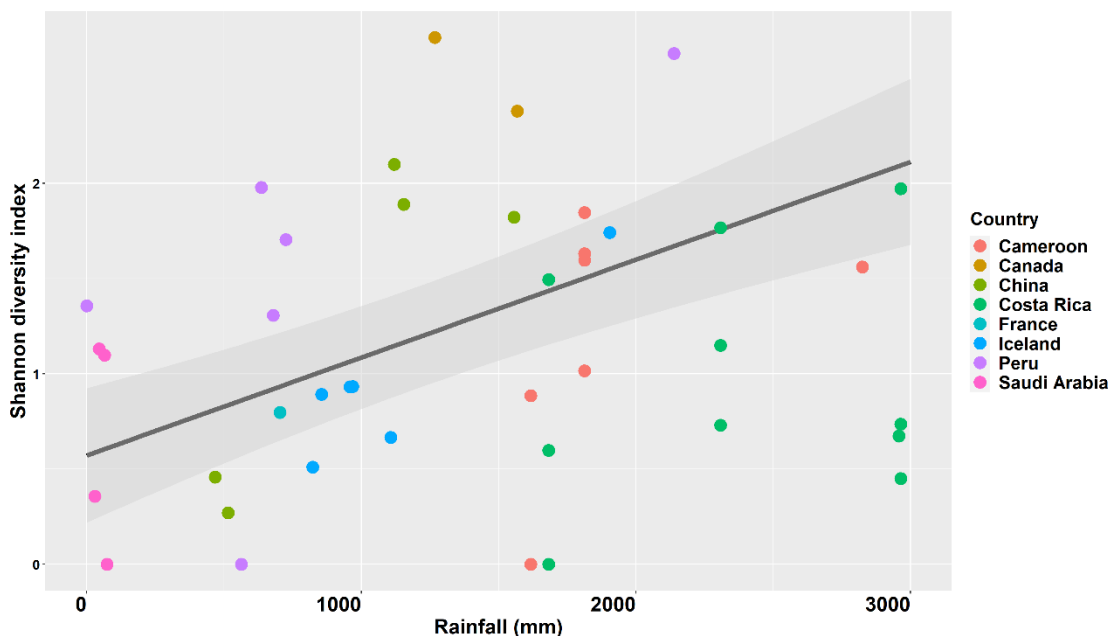

424

425 **Figure 5: Mean annual rainfall is significantly correlated with soil yeast diversity.** Here, the Shannon diversity  
 426 index of our sampling sites is plotted against mean annual precipitation. Sampling sites are colored by country.  
 427 The line plots the model predictions with associated uncertainty shaded in grey.

### 428 *3.6 Air traffic volume as a predictor of shared species between countries*

429 36 yeast species were found in more than one country. The following five country pairs  
 430 had no soil yeast species in common: Iceland-Cameroon, Iceland-Costa Rica, Iceland-  
 431 France, Iceland-Saudi Arabia, and Cameroon-Saudi Arabia. The number of shared

432 species between the remaining 31 pairs ranged from one to 11 (Figure 6b). Air traffic  
 433 volume data extracted from the Global Transnational Mobility Dataset showed that 25  
 434 700 496 trips were made between China and France between 2011-2016. During the  
 435 same period, only 81 trips were made between Iceland and Cameroon (Figure 6a,  
 436 Supplementary Table 3). We performed a linear regression analysis between air traffic  
 437 volume, geographic distance, and the number of shared species between countries.  
 438 While we found no significant correlation between geographic distance and  
 439 sharedness, air traffic volume was significantly correlated with the number of shared  
 440 species between countries ( $p = 0.003$ , Figure 7).

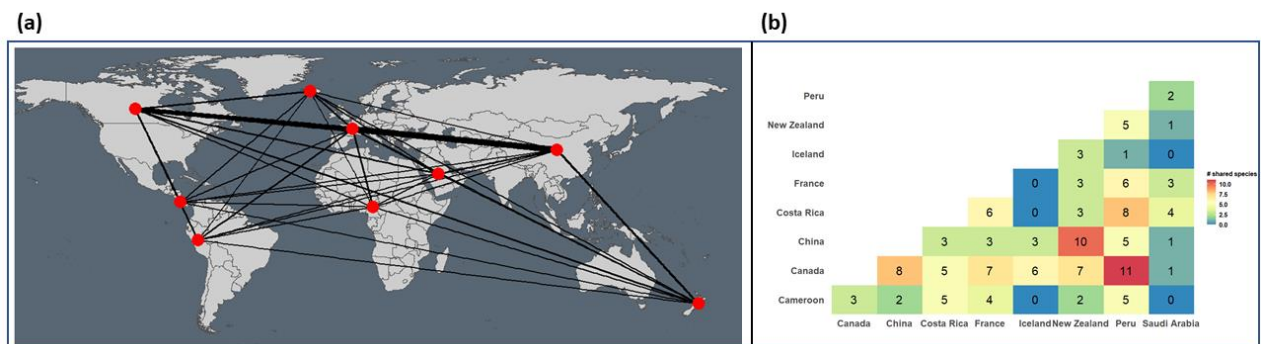

441

442 **Figure 6: Air traffic volume between countries is correlated with number of shared**  
 443 **species.** (a) Volume of air traffic between the nine countries from 2011-2016. Thickness  
 444 of the line indicates volume. (b) Heat map showing the number of shared species  
 445 between country pairs.

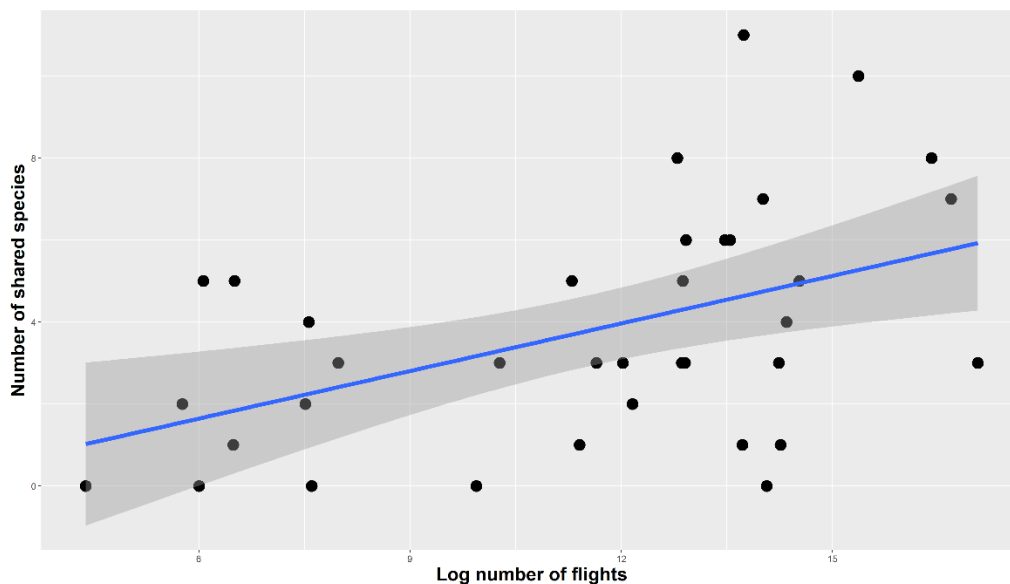

446

447 **Figure 7: Number of shared species between countries is significantly correlated with traffic volume**  
 448 **between them.** We plotted the log number of trips made between country pairs between 2011-2016 against  
 449 the number of yeast species shared between them.

450 We constructed neighbour-joining (NJ) trees in MEGA7 (Kumar et al., 2016) based on  
 451 ITS sequences of the four most shared species in our population: *Debaryomyces*



452 *hansenii* (7 countries), *Papiliotrema laurentii* (6 countries), *Candida tropicalis* (5  
453 countries) and *Torulasporea delbrueckii* (5 countries). The NJ trees highlighted the lack  
454 of strict geographical clustering of isolates by country: for an example, most *P. laurentii*  
455 isolates found in New Zealand, Costa Rica, China, Peru, and Cameroon had identical  
456 ITS sequences and formed a cluster with most Canadian isolates (Figure 7). The NJ  
457 trees for the remaining three species can be found in Supplementary Dataset 2. This  
458 result is consistent with the hypothesis of recent long-distance dispersals for many of  
459 the shared species.

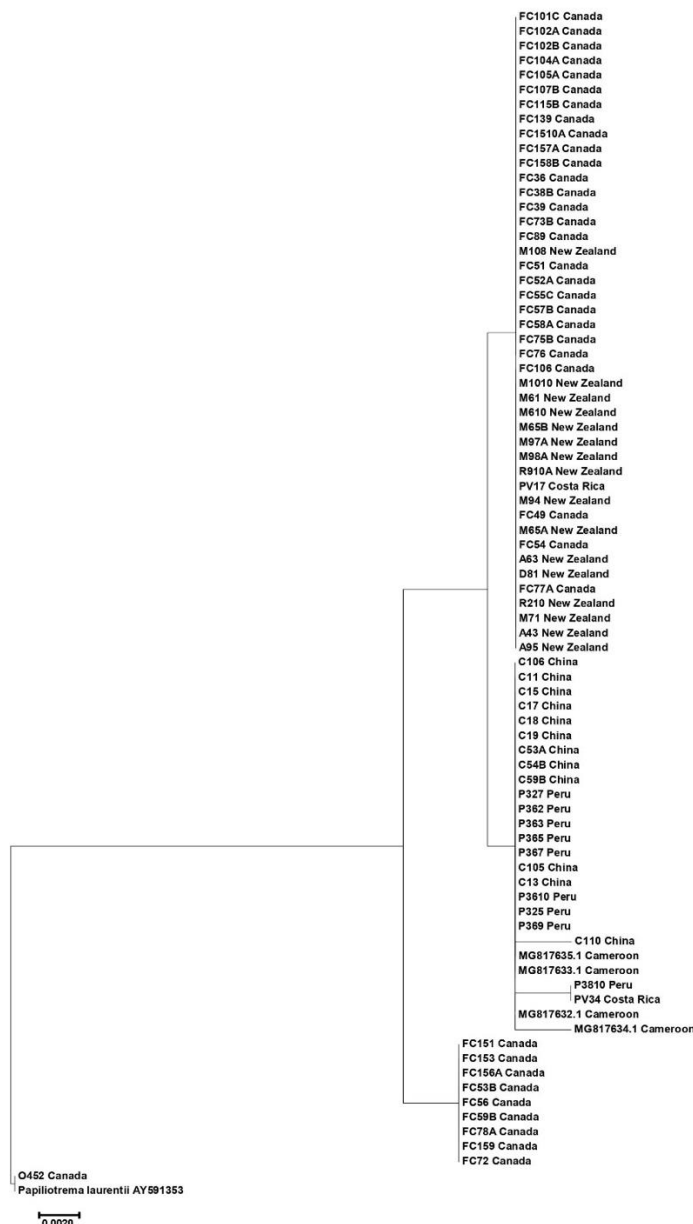

460

461 **Figure 8:** The neighbour-joining tree of *Papiliotrema laurentii* global isolates found in  
462 our study. No geographical clustering is observed, suggesting frequent gene flow  
463 between populations.

### 464 *3.7 Comparison to culture-independent, metagenomics approach*

465 Our study exclusively used culture-dependent methods to investigate global diversity  
 466 of culturable soil yeasts. We compared our findings to an excellent study conducted  
 467 by Tedersoo and colleagues where a metagenomics approach was taken to study  
 468 global soil fungal diversity (Tedersoo et al., 2014). For the four countries that  
 469 overlapped between our study and that of Tedersoo et al. (2014), we conducted a  
 470 detailed side-by-side comparison of results, shown in Table 2. Below we highlight  
 471 results from two countries.

472 From Cameroonian soils, Tedersoo et al. obtained 278 fungal OTUs (Operational  
 473 Taxonomic Units) with species identity determined for 72. Limited information is  
 474 available for 103 OTUs that were only annotated with a variation of either “fungal\_sp”  
 475 or “uncultured\_fungus”. The remaining 103 OTUs were annotated to higher fungal  
 476 phylogenetic ranks such as Kingdom, Phylum, Class, Order or Family. Our study  
 477 obtained 110 ITS sequences from Cameroonian soil yeasts. Species identity was  
 478 determined for 94, genus was established for another nine and the remaining seven  
 479 were annotated as novel species of the fungal kingdom. Our BLAST analyses revealed  
 480 no overlapping sequences between the two datasets.

481 For China, Tedersoo et al. found 572 fungal OTUs, 125 of which were annotated to the  
 482 species level. The remaining OTUs were annotated to the genus or a higher taxonomic  
 483 rank. We obtained 230 ITS sequences from Chinese soil yeasts: we established species  
 484 identity for 209 sequences and genus identity for another three. The remaining 18  
 485 sequences, clustered into three groups, were identified as putative novel fungal  
 486 species. Four sequence overlapped between the two studies and their species  
 487 annotations were consistent between the two studies.

488 **Table 3: Comparison of findings between Tedersoo et al. and current study for four**  
 489 **countries (Tedersoo et al., 2014).** Tedersoo et al. used metagenomics to determine the  
 490 diversity of all soil fungi. The current study used culture-dependent methods and  
 491 fungal DNA barcoding

|                 |                              | <i>Tedersoo et al.</i> |            | <i>Current study</i> |            |
|-----------------|------------------------------|------------------------|------------|----------------------|------------|
|                 |                              | Number                 | Proportion | Number               | Proportion |
| <i>Cameroon</i> | Total OTUs found             | 272                    | 100%       | 110                  | 100%       |
|                 | OTUs with species determined | 73                     | 27%        | 94                   | 85%        |
|                 | Higher taxonomy determined   | 52                     | 19%        | 16                   | 15%        |
|                 | Unannotated                  | 147                    | 54%        | 0                    | 0%         |
| <i>Canada</i>   | Total OTUs found             | 413                    | 100%       | 261                  | 100%       |
|                 | OTUs with species determined | 104                    | 25%        | 230                  | 88%        |

|                           |                              |     |      |     |      |
|---------------------------|------------------------------|-----|------|-----|------|
|                           | Higher taxonomy determined   | 198 | 48%  | 31  | 12%  |
|                           | Unannotated                  | 111 | 27%  | 0   | 0%   |
| <b><i>China</i></b>       | Total OTUs found             | 572 | 100% | 230 | 100% |
|                           | OTUs with species determined | 145 | 25%  | 209 | 91%  |
|                           | Higher taxonomy determined   | 235 | 41%  | 21  | 9%   |
|                           | Unannotated                  | 192 | 34%  | 0   | 0%   |
| <b><i>New Zealand</i></b> | Total OTUs found             | 269 | 100% | 155 | 100% |
|                           | OTUs with species determined | 73  | 27%  | 146 | 94%  |
|                           | Higher taxonomy determined   | 87  | 32%  | 9   | 6%   |
|                           | Unannotated                  | 109 | 41%  | 0   | 0%   |

492

#### 493 **4. Discussion**

494 Despite being one of the most accessible ecological niches, soil remains an enigmatic  
 495 source of yeast diversity and ecology. Given that most yeast species are not  
 496 geographically widely distributed, extensive environmental sampling across diverse  
 497 regions, habitats and climates is required to uncover new species and diversity  
 498 patterns. Elucidating global trends and dynamics would also allow us to predict the  
 499 structure and diversity of soil yeast populations in unsampled locations. Using a set of  
 500 global soil samples from nine countries in six continents, we address this knowledge  
 501 gap by characterizing global patterns and predictors of culturable soil yeast diversity.  
 502 Our study uncovered 134 soil yeast species among 1473 isolates, including 41  
 503 previously undescribed species. We identified mean annual precipitation and air traffic  
 504 volume as significant predictors of soil yeast communities on a global scale. Our  
 505 findings highlight the influence of both climatic factors and anthropogenic activity on  
 506 soil yeast populations across the globe.

507 We found mean annual precipitation to be the strongest predictor of culturable soil  
 508 yeast diversity across both local and global scales. Previous metagenomic studies have  
 509 established mean annual precipitation as one of the climatic variables associated with  
 510 soil fungal diversity (Egidi et al., 2019; Tedersoo et al., 2014). Our results confirm that  
 511 this trend persists for culturable yeast communities in global soils as well. Vegetation  
 512 is not a likely mediating factor in the observed positive correlation between  
 513 precipitation and soil yeast diversity as Tedersoo et al. found plant diversity to be  
 514 uncoupled from soil fungal richness (Tedersoo et al., 2014). Fungal communities in dry,  
 515 semi-arid soils contain significantly more Ascomycota fungi than Basidiomycota (Abed

516 et al., 2013; Murgia et al., 2019; Suleiman et al., 2019). We found a reversal of this trend  
517 in global soil yeast communities where basidiomycetous yeasts were found to be more  
518 prevalent in sampling sites receiving less rainfall ( $p < 0.05$ ). Some soil-dwelling,  
519 basidiomycetous yeasts are known to produce biofilms that allow them to persist in  
520 low moisture, oligotrophic conditions (Spencer and Spencer, 1997). Low moisture, and  
521 resulting lack of nutrients, could favor cellular structures and metabolic activities of  
522 yeasts in one Phylum over the other, creating rainfall-associated global diversity  
523 patterns observed in our study. Given our findings, we hypothesize that extreme  
524 rainfall and drought events brought on by global warming are likely shifting the  
525 established landscape of soil yeast communities. This is especially alarming given the  
526 significant presence of pathogenic yeasts we detected in the soils. 15% of all yeast  
527 isolates found in our study belong to common pathogenic yeast species capable of  
528 causing deadly systemic infections. Altered rainfall patterns, and resulting changes in  
529 soil microclimates, could cause outgrowths of pathogenic species and lead to  
530 emergence of new fungal infections. With soil ecosystems being a primary source of  
531 bacterial and fungal infections, any changes and shifts in soil microbiomes could pose  
532 a significant threat to human health.

533 Each of the nine countries investigated in our study was unique in the composition  
534 and structure of its culturable soil yeast population. 73% of the yeast species found in  
535 our study (98 out of 134) were specific to a single country. The fragmented nature of  
536 soil yeast distributions has been noted in previous studies where only a few species  
537 were found to be shared between sampling sites, even within the same region or  
538 country (Yurkov, 2018). The nine countries included in our study are separated by  
539 thousands of kilometers, with the two closest countries being France and Iceland (2235  
540 km). Geographic isolation was most likely a key factor in limiting the spread and  
541 exchange of yeasts between populations, at least until recently when anthropogenic  
542 activity has strongly improved the connectivity between countries and continents.

543 Our findings suggest that human activities can contribute to the changing yeast  
544 distribution in soil environments across the globe. International travel has increased  
545 exponentially in the past few decades with international tourist arrivals increasing from  
546 25 million in 1950 to a record-high 1.4 billion in 2018 (UNWTO, 2018). The global air  
547 transportation network has the small-world property where most countries can be  
548 reached from each other via a few flight hops (Wandelt and Sun, 2015). While we found  
549 unique yeast species in most localities, 36 yeast species (~25% of all species found)  
550 were shared between at least two countries. Countries with more flights occurring  
551 between them had more yeast species in common, which implicates human travel as  
552 a likely facilitator in the spread of endemic yeasts across geographical borders. The  
553 lack of geographical clustering of the most shared species in our population supports  
554 gene flow between populations in different countries. The covid-19 pandemic has

555 greatly shifted the political and economical landscape of our planet. Tourism both  
556 within and between countries has seen a drastic drop with accompanying tightening  
557 of borders between countries. The potential impact of the COVID-19 pandemic on  
558 culturable yeast populations remains to be determined.

559 The current estimate of ~1500 yeast species in existence is almost certainly a  
560 significant underestimate (Kurtzman et al., 2011). Both culture-dependent and  
561 independent studies routinely isolate novel yeast species from the environment. Our  
562 study is one of many recent surveys to find previously undescribed species accounting  
563 for as much as 30% of natural yeast populations (Yurkov, 2018), implying that every  
564 one of three yeast species recovered from the environment is likely to be a new one.  
565 Investigators often turn to natural soils in search of novel yeast strains with commercial  
566 and biotechnological potential. A novel strain of *Pichia kudriavzevii* (syn. *Candida*  
567 *krusei*) isolated from soil in a sugarcane field in Thailand was shown to be more  
568 thermotolerant and produce more ethanol than the Thai industrial strain  
569 *Saccharomyces cerevisiae* TISTR 5606 (Pongcharoen et al., 2018). Presence of species  
570 of the genus *Kazachstania* in mixed cultures of *Saccharomyces cerevisiae* gives rise to  
571 fermented wines with diverse aroma profiles: however, *Kazachstania* species are unable  
572 to complete fermentation in monocultures (Jood et al., 2017). Discovery of new  
573 *Kazachstania* species with more desirable fermentative abilities can aid the full  
574 exploitation of this genus in commercial wine fermentation. The thermo and  
575 halotolerant yeast *Blastobotrys adenivorans* is highly useful in a wide range of  
576 biotechnological applications including the production of secretory enzymes, as a host  
577 for heterologous gene expression and as a biological component in biosensors (Kunze  
578 et al., 2017). The metabolic and fermentative capabilities of the novel *Kazachstania*  
579 species we found in Peruvian soil and the novel *Blastobotrys* species found in French  
580 soil remain to be evaluated.

581 In recent years, researchers have come to view metagenomics as a valuable tool in the  
582 investigation of microbial diversity in complex ecological systems. While high  
583 throughput sequencing is crucial in unearthing large-scale patterns at higher  
584 taxonomic levels, it fails to be adequately informative on targeted groups of organisms  
585 such as yeasts. Our findings indicate that culture-dependent methods can succeed  
586 where metagenomics may fail in the study of environmental yeast diversity. Limited  
587 information on yeast diversity could be extracted from previous metagenomics studies  
588 on global soil fungal diversity (Egidi et al., 2019; Tedersoo et al., 2014). Yeasts do not  
589 form a monophyletic group that can be easily identified based on sequences alone.  
590 Extracting ITS sequences of known yeasts from large metagenomics datasets is a time-  
591 consuming task that requires personnel with advanced knowledge of yeast taxonomy.  
592 For potentially novel species, the metagenomic approach would completely fail to  
593 identify them as yeasts. The metagenomics approach is largely limited by the current

594 state of knowledge on species taxonomy and annotation. In Tedersoo et al.'s study,  
595 species identity was only established for ~25% of the fungal OTUs found in Cameroon,  
596 Canada, China and New Zealand: over 30% of the OTUs remained unidentified. Our  
597 global collection of soil yeast isolates with identity established and manually validated  
598 via ITS sequencing provides a much-needed reference set for future investigators on  
599 yeast diversity and taxonomy.

600 Fungi isolated via culture-dependent methods can be identified as yeasts by  
601 morphology and can be further characterized using genomics, metabolomics, and  
602 transcriptomics (Xu 2020). Given the relatively low numbers of yeast cells in soil  
603 compared to bacteria, mold and other fungi, their DNA can easily escape detection in  
604 metagenomics studies, which could explain the lack of overlapping yeast sequences  
605 between our study and that of Tedersoo et al. (2014). Our use of culture-dependent  
606 methods ensured that the yeasts we found were alive and more likely to be true soil-  
607 dwellers as opposed to dead cells temporarily transferred to soil from elsewhere.  
608 Selective enrichment and culturing from soil samples in the lab remains the most  
609 effective ways of identifying and studying yeasts.

610

## 611 **5. Conclusions**

612 Our investigation into global patterns in culturable soil yeast diversity reaffirms soil as  
613 an important reservoir of environmental yeast species, both known and yet  
614 undiscovered. Precipitation emerges as the main predictor of soil yeast diversity across  
615 local and global scales. Ongoing global warming crisis and accompanying changes in  
616 rainfall could lead to expansion of pathogenic yeasts that already account for a sizable  
617 proportion of soil yeast communities. Our findings implicate international travel as a  
618 facilitator in the movement of yeast species across borders, with phylogenetic evidence  
619 suggesting long-distance gene flow between yeast populations. More environmental  
620 sampling is required to further uncover soil yeast diversity, isolates with commercial  
621 and biotechnological value and to monitor species that could pose a threat to human  
622 health.

623

## 624 **Acknowledgements**

625 We thank the following people for contributing soil samples: Haoran Jia, Yongjie  
626 Zhang, Thomas Harrison, Sebastian Harrison, Arshia Kazerouni, and Greg Korfanty for  
627 contributing soil samples for this study. HS is supported by an NSERC CGS-D  
628 Scholarship. This research is supported by Natural Sciences and Engineering Research  
629 Council (NSERC) of Canada (RGPIN-2020-05732) and by the Global Science Initiative  
630 Award of McMaster University to JX.

631 **Author contributions**

632 Study conceived by HS and JX; soil collections were coordinated by JX; lab work  
633 performed by HS, YL, RA, AA, and HY; data analyses performed by HS; first manuscript  
634 draft written by HS; final draft edited by JX; all authors have read and approved the  
635 final version of the manuscript.

636 **Conflicts of Interest**

637 The authors declare no conflict of interest

638

639 **References**

- 640 Abbasian, F., Palanisami, T., Megharaj, M., Naidu, R., Lockington, R., Ramadass, K.,  
641 2016. Microbial diversity and hydrocarbon degrading gene capacity of a crude  
642 oil field soil as determined by metagenomics analysis. *Biotechnol. Prog.* 32, 638–  
643 648. <https://doi.org/10.1002/btpr.2249>
- 644 Abed, R.M.M., Al-Sadi, A.M., Al-Shehi, M., Al-Hinai, S., Robinson, M.D., 2013. Diversity  
645 of free-living and lichenized fungal communities in biological soil crusts of the  
646 Sultanate of Oman and their role in improving soil properties. *Soil Biol. Biochem.*  
647 57, 695–705. <https://doi.org/10.1016/j.soilbio.2012.07.023>
- 648 Abia, A.L.K., Alisoltani, A., Keshri, J., Ubomba-Jaswa, E., 2018. Metagenomic analysis of  
649 the bacterial communities and their functional profiles in water and sediments of  
650 the Apies River, South Africa, as a function of land use. *Sci. Total Environ.* 616–  
651 617, 326–334. <https://doi.org/10.1016/j.scitotenv.2017.10.322>
- 652 Aboutalebian, S., Mahmoudi, S., Okhovat, A., Khodavaisy, S., Mirhendi, H., 2020.  
653 Otomycosis Due to the Rare Fungi *Talaromyces purpurogenus*, *Naganishia*  
654 *albida* and *Filobasidium magnum*. *Mycopathologia* 185, 569–575.  
655 <https://doi.org/10.1007/s11046-020-00439-8>
- 656 Adam, H., Groenewald, M., Mohan, S., Richardson, S., Bunn, U., Gibas, C.F.C.,  
657 Poutanen, S., Sigler, L., 2009. Identification of a new species, *Candida subhashii*,  
658 as a cause of peritonitis. *Med. Mycol.* 47, 305–311.  
659 <https://doi.org/10.1080/13693780802380545>
- 660 Aljohani, R., Samarasinghe, H., Ashu, T., Xu, J. 2018. Diversity and relationships among  
661 strains of culturable yeasts in agricultural soils in Cameroon. *Sci. Rep.* 8, 15687.  
662 <http://dx.doi.org/10.1038/s41598-018-34122-2>
- 663 Bates, D., Mächler, M., Bolker, B.M., Walker, S.C., 2015. Fitting linear mixed-effects  
664 models using lme4. *J. Stat. Softw.* 67, 1–48. <https://doi.org/10.18637/jss.v067.i01>
- 665 Białkowska, A.M., Szulczewska, K.M., Krysiak, J., Florczak, T., Gromek, E., Kassassir, H.,  
666 Kur, J., Turkiewicz, M., 2017. Genetic and biochemical characterization of yeasts

- 667 isolated from Antarctic soil samples. *Polar Biol.* 40, 1787–1803.  
668 <https://doi.org/10.1007/s00300-017-2102-7>
- 669 Botha, A., 2011. The importance and ecology of yeasts in soil. *Soil Biol. Biochem.*  
670 <https://doi.org/10.1016/j.soilbio.2010.10.001>
- 671 Connell, L., Redman, R., Craig, S., Scorzetti, G., Iszard, M., Rodriguez, R., 2008. Diversity  
672 of soil yeasts isolated from South Victoria Land, Antarctica. *Microb. Ecol.* 56,  
673 448–459. <https://doi.org/10.1007/s00248-008-9363-1>
- 674 Egidi, E., Delgado-Baquerizo, M., Plett, J.M., Wang, J., Eldridge, D.J., Bardgett, R.D.,  
675 Maestre, F.T., Singh, B.K., 2019. A few Ascomycota taxa dominate soil fungal  
676 communities worldwide. *Nat. Commun.* 10, 1–9. [https://doi.org/10.1038/s41467-](https://doi.org/10.1038/s41467-019-10373-z)  
677 [019-10373-z](https://doi.org/10.1038/s41467-019-10373-z)
- 678 Findlater, A., Bogoch, I.I., 2018. Human Mobility and the Global Spread of Infectious  
679 Diseases: A Focus on Air Travel. *Trends Parasitol.*  
680 <https://doi.org/10.1016/j.pt.2018.07.004>
- 681 Frac, M., Hannula, S.E., Belka, M., Jędrzycka, M., 2018. Fungal biodiversity and their  
682 role in soil health. *Front. Microbiol.* <https://doi.org/10.3389/fmicb.2018.00707>
- 683 Groenewald, M., Lombard, L., de Vries, M., Lopez, A.G., Smith, M., Crous, P.W., 2018.  
684 Diversity of yeast species from Dutch garden soil and the description of six novel  
685 Ascomycetes. *FEMS Yeast Res.* 18, 76. <https://doi.org/10.1093/femsyr/foy076>
- 686 Hilber-Bodmer, M., Schmid, M., Ahrens, C.H., Freimoser, F.M., 2017. Competition  
687 assays and physiological experiments of soil and phyllosphere yeasts identify  
688 *Candida subhashii* as a novel antagonist of filamentous fungi. *BMC Microbiol.*  
689 17, 1–15. <https://doi.org/10.1186/s12866-016-0908-z>
- 690 Hsieh, T.C., Ma, K.H., Chao, A., 2016. iNEXT: an R package for rarefaction and  
691 extrapolation of species diversity ( <scp>H</scp> ill numbers). *Methods Ecol.*  
692 *Evol.* 7, 1451–1456. <https://doi.org/10.1111/2041-210X.12613>
- 693 Into, P., Pontes, A., Sampaio, J.P., Limtong, S., 2020. Yeast Diversity Associated with  
694 the Phylloplane of Corn Plants Cultivated in Thailand. *Microorganisms* 8, 80.  
695 <https://doi.org/10.3390/microorganisms8010080>
- 696 Jensen, R.H., Arendrup, M.C., 2011. *Candida palmioleophila*: Characterization of a  
697 previously overlooked pathogen and its unique susceptibility profile in  
698 comparison with five related species. *J. Clin. Microbiol.* 49, 549–556.  
699 <https://doi.org/10.1128/JCM.02071-10>
- 700 Jood, I., Hoff, J.W., Setati, M.E., 2017. Evaluating fermentation characteristics of  
701 *Kazachstania* spp. and their potential influence on wine quality. *World J.*  
702 *Microbiol. Biotechnol.* 33. <https://doi.org/10.1007/s11274-017-2299-1>
- 703 Kahle, D., Wickham, H., 2013. ggmap: Spatial Visualization with ggplot2. *R J.* 5, 144–



- 704 161.
- 705 Ke, Q., Fulmer, P., Mizutani, A., 2018. Toxicological evaluation of  $\beta$ -Galactosidase  
706 enzyme produced by *Papiliotrema terrestris*. *Regul. Toxicol. Pharmacol.* 92, 213–  
707 219. <https://doi.org/10.1016/j.yrtph.2017.12.002>
- 708 Kumar, S., Stecher, G., Tamura, K., 2016. MEGA7: Molecular Evolutionary Genetics  
709 Analysis Version 7.0 for Bigger Datasets. *Mol. Biol. Evol.* 33, 1870–1874.  
710 <https://doi.org/10.1093/molbev/msw054>
- 711 Kunze, G., Bischoff, F., Chamas, A., Litwinska, K., Matthes, F., Boer, E., 2017.  
712 Applications of blastobotrys (arxula) adenivorans in biotechnology, in: *Yeast*  
713 *Diversity in Human Welfare*. Springer Singapore, pp. 455–479.  
714 [https://doi.org/10.1007/978-981-10-2621-8\\_18](https://doi.org/10.1007/978-981-10-2621-8_18)
- 715 Kurtzman, C., Fell, J.W., Boekhout, T. (Eds.), 2011. *The Yeasts A Taxonomic Study*, 5th  
716 edition. ed. Elsevier.
- 717 Li, A.H., Yuan, F.X., Groenewald, M., Bensch, K., Yurkov, A.M., Li, K., Han, P.J., Guo, L.D.,  
718 Aime, M.C., Sampaio, J.P., Jindamorakot, S., Turchetti, B., Inacio, J., Fungsin, B.,  
719 Wang, Q.M., Bai, F.Y., 2020. Diversity and phylogeny of basidiomycetous yeasts  
720 from plant leaves and soil: Proposal of two new orders, three new families, eight  
721 new genera and one hundred and seven new species. *Stud. Mycol.* 96, 17–140.  
722 <https://doi.org/10.1016/j.simyco.2020.01.002>
- 723 Li, X., Qin, L., 2005. Metagenomics-based drug discovery and marine microbial  
724 diversity. *Trends Biotechnol.* 23, 539–543.  
725 <https://doi.org/10.1016/j.tibtech.2005.08.006>
- 726 Monteiro Moreira, G.A., Martins do Vale, H.M., 2020. Soil Yeast Communities in  
727 Revegetated Post-Mining and Adjacent Native Areas in Central Brazil.  
728 *Microorganisms* 8, 1116. <https://doi.org/10.3390/microorganisms8081116>
- 729 Murgia, M., Fiamma, M., Barac, A., Deligios, M., Mazzarello, V., Paglietti, B.,  
730 Cappuccinelli, P., Al-Qahtani, A., Squartini, A., Rubino, S., Al-Ahdal, M.N., 2019.  
731 Biodiversity of fungi in hot desert sands. *Microbiologyopen* 8, e00595.  
732 <https://doi.org/10.1002/mbo3.595>
- 733 NAKASE, T., ITOH, M., SUZUKI, M., KOMAGATA, K., KODAMA, T., 1988. *Candida*  
734 *palmioleophila* sp. nov., a yeast capable of assimilating crude palm oil, formerly  
735 identified as *Torulopsis candida*. *J. Gen. Appl. Microbiol.* 34, 493–498.  
736 <https://doi.org/10.2323/jgam.34.493>
- 737 Ogaki, M.B., Teixeira, D.R., Vieira, R., Lírio, J.M., Felizardo, J.P.S., Abuchacra, R.C.,  
738 Cardoso, R.P., Zani, C.L., Alves, T.M.A., Junior, P.A.S., Murta, S.M.F., Barbosa, E.C.,  
739 Oliveira, J.G., Ceravolo, I.P., Pereira, P.O., Rosa, C.A., Rosa, L.H., 2020. Diversity and  
740 bioprospecting of cultivable fungal assemblages in sediments of lakes in the  
741 Antarctic Peninsula. *Fungal Biol.* 124, 601–611.

- 742 <https://doi.org/10.1016/j.funbio.2020.02.015>
- 743 Okai, M., Betsuno, A., Shirao, A., Obara, N., Suzuki, K., Takei, T., Takashio, M., Ishida,  
744 M., Urano, N., 2017. *Citeromyces matritensis* M37 is a salt-tolerant yeast that  
745 produces ethanol from salted algae. *Can. J. Microbiol.* 63, 20–26.  
746 <https://doi.org/10.1139/cjm-2016-0259>
- 747 Oksanen, J., Blanchet, F.G., Friendly, M., Kindt, R., Legendre, P., Mcglinn, D., Minchin,  
748 P.R., O'hara, R.B., Simpson, G.L., Solymos, P., Henry, M., Stevens, H., Szoecs, E.,  
749 Maintainer, H.W., 2020. Package "vegan" Title Community Ecology Package  
750 Version 2.5-7.
- 751 Pongcharoen, P., Chawneua, J., Tawong, W., 2018. High temperature alcoholic  
752 fermentation by new thermotolerant yeast strains *Pichia kudriavzevii* isolated  
753 from sugarcane field soil. *Agric. Nat. Resour.* 52, 511–518.  
754 <https://doi.org/10.1016/j.anres.2018.11.017>
- 755 Recchi, E., Deutschmann, E., Vespe, M., 2019. Estimating Transnational Human  
756 Mobility on a Global Scale. *SSRN Electron. J.*  
757 <https://doi.org/10.2139/ssrn.3384000>
- 758 Roesch, L.F.W., Fulthorpe, R.R., Riva, A., Casella, G., Hadwin, A.K.M., Kent, A.D., Daroub,  
759 S.H., Camargo, F.A.O., Farmerie, W.G., Triplett, E.W., 2007. Pyrosequencing  
760 enumerates and contrasts soil microbial diversity. *ISME J.* 1, 283–290.  
761 <https://doi.org/10.1038/ismej.2007.53>
- 762 Samarasinghe, H., Aljohani, R., Jimenez, C., Xu, J., 2019. Fantastic yeasts and where to  
763 find them: The discovery of a predominantly clonal *Cryptococcus deneoformans*  
764 population in Saudi Arabian soils. *FEMS Microbiol. Ecol.* 95.  
765 <https://doi.org/10.1093/femsec/fiz122>
- 766 Spencer, J.F.T., Spencer, D.M., 1997. Ecology: Where Yeasts Live, in: *Yeasts in Natural  
767 and Artificial Habitats.* Springer Berlin Heidelberg, pp. 33–58.  
768 [https://doi.org/10.1007/978-3-662-03370-8\\_4](https://doi.org/10.1007/978-3-662-03370-8_4)
- 769 Stamatakis, A., 2014. RAxML version 8: A tool for phylogenetic analysis and post-  
770 analysis of large phylogenies. *Bioinformatics* 30, 1312–1313.  
771 <https://doi.org/10.1093/bioinformatics/btu033>
- 772 Suleiman, M.K., Dixon, K., Commander, L., Nevill, P., Quoreshi, A.M., Bhat, N.R.,  
773 Manuvel, A.J., Sivadasan, M.T., 2019. Assessment of the diversity of fungal  
774 community composition associated with *Vachellia pachyceras* and its  
775 Rhizosphere soil from Kuwait desert. *Front. Microbiol.* 10, 63.  
776 <https://doi.org/10.3389/fmicb.2019.00063>
- 777 Tedersoo, L., Bahram, M., Pölme, S., Kõljalg, U., Yorou, N.S., Wijesundera, R., Ruiz, L.V.,  
778 Vasco-Palacios, A.M., Thu, P.Q., Suija, A., Smith, M.E., Sharp, C., Saluveer, E.,  
779 Saitta, A., Rosas, M., Riit, T., Ratkowsky, D., Pritsch, K., Põldmaa, K., Piepenbring,

- 780 M., Phosri, C., Peterson, M., Parts, K., Pärtel, K., Otsing, E., Nouhra, E., Njouonkou,  
781 A.L., Nilsson, R.H., Morgado, L.N., Mayor, J., May, T.W., Majuakim, L., Lodge, D.J.,  
782 Lee, S.S., Larsson, K.-H., Kohout, P., Hosaka, K., Hiiesalu, I., Henkel, T.W., Harend,  
783 H., Guo, L., Greslebin, A., Grelet, G., Geml, J., Gates, G., Dunstan, W., Dunk, C.,  
784 Drenkhan, R., Dearnaley, J., De Kesel, A., Dang, T., Chen, X., Buegger, F., Brearley,  
785 F.Q., Bonito, G., Anslan, S., Abell, S., Abarenkov, K., 2014. Global diversity and  
786 geography of soil fungi. *Science* (80-. ). 346.
- 787 Tepeevea, A.N., Glushakova, A.M., Kachalkin, A. V., 2018. Yeast communities of the  
788 Moscow city soils. *Microbiol. (Russian Fed.* 87, 407–415.  
789 <https://doi.org/10.1134/S0026261718030128>
- 790 UNWTO World Tourism Barometer and Statistical Annex, November 2018, 2018. .  
791 UNWTO World Tour. *Barom.* 16, 1–36.  
792 <https://doi.org/10.18111/wtobarometereng.2018.16.1.5>
- 793 Villarreal, P., Carrasco, M., Barahona, S., Alcaíno, J., Cifuentes, V., Baeza, M., 2018.  
794 Antarctic yeasts: Analysis of their freeze-thaw tolerance and production of  
795 antifreeze proteins, fatty acids and ergosterol. *BMC Microbiol.* 18, 66.  
796 <https://doi.org/10.1186/s12866-018-1214-8>
- 797 Vishniac, H.S., 2006. A multivariate analysis of soil yeasts isolated from a latitudinal  
798 gradient. *Microb. Ecol.* <https://doi.org/10.1007/s00248-006-9066-4>
- 799 Vishniac, H.S., 1996. Biodiversity of yeasts and filamentous microfungi in terrestrial  
800 Antarctic ecosystems. *Biodivers. Conserv.* 5, 1365–1378.  
801 <https://doi.org/10.1007/BF00051983>
- 802 Vu, D., Groenewald, M., Szöke, S., Cardinali, G., Eberhardt, U., Stielow, B., de Vries, M.,  
803 Verkleij, G.J.M., Crous, P.W., Boekhout, T., Robert, V., 2016. DNA barcoding  
804 analysis of more than 9 000 yeast isolates contributes to quantitative thresholds  
805 for yeast species and genera delimitation. *Stud. Mycol.* 85, 91–105.  
806 <https://doi.org/10.1016/j.simyco.2016.11.007>
- 807 Wandelt, S., Sun, X., 2015. Evolution of the international air transportation country  
808 network from 2002 to 2013. *Transp. Res. Part E Logist. Transp. Rev.* 82, 55–78.  
809 <https://doi.org/10.1016/j.tre.2015.08.002>
- 810 Wang, X., Wang, Y., Ning, S., Shi, S., Tan, L., 2020. Improving Azo Dye Decolorization  
811 Performance and Halotolerance of *Pichia occidentalis* A2 by Static Magnetic  
812 Field and Possible Mechanisms Through Comparative Transcriptome Analysis.  
813 *Front. Microbiol.* 11, 712. <https://doi.org/10.3389/fmicb.2020.00712>
- 814 Wickham, H., 2016. *ggplot2: Elegant Graphics for Data Analysis*. Springer-Verlag New  
815 York.
- 816 Wickham, H., Averick, M., Bryan, J., Chang, W., McGowan, L., François, R., Grolemund,  
817 G., Hayes, A., Henry, L., Hester, J., Kuhn, M., Pedersen, T., Miller, E., Bache, S.,

- 818 Müller, K., Ooms, J., Robinson, D., Seidel, D., Spinu, V., Takahashi, K., Vaughan, D.,  
819 Wilke, C., Woo, K., Yutani, H., 2019. Welcome to the Tidyverse. *J. Open Source*  
820 *Softw.* 4, 1686. <https://doi.org/10.21105/joss.01686>
- 821 Xu, J., 2016. Fungal DNA barcoding. *Genome.* 59, 913-932  
822 <https://doi.org/10.1139/gen-2016-0046>
- 823 Xu, J., 2020. Fungal species concepts in the genomics era. *Genome* 63, 459-468.  
824 <https://doi.org/10.1139/gen-2020-0022>
- 825 Yurkov, A.M., 2018. Yeasts of the soil - obscure but precious. *Yeast* 35, 369–378.  
826 <https://doi.org/10.1002/yea.3310>
- 827 Yurkov, A.M., Kemler, M., Begerow, D., 2012. Assessment of yeast diversity in soils  
828 under different management regimes. *Fungal Ecol.* 5, 24–35.  
829 <https://doi.org/10.1016/j.funeco.2011.07.004>
- 830 Yurkov, A.M., Röhl, O., Pontes, A., Carvalho, C., Maldonado, C., Sampaio, J.P., 2016a.  
831 Local climatic conditions constrain soil yeast diversity patterns in Mediterranean  
832 forests, woodlands and scrub biome. *FEMS Yeast Res.* 16, fov103.  
833 <https://doi.org/10.1093/femsyr/fov103>
- 834 Yurkov, A.M., Wehde, T., Federici, J., Schäfer, A.M., Ebinghaus, M., Lotze-Engelhard, S.,  
835 Mittelbach, M., Prior, R., Richter, C., Röhl, O., Begerow, D., 2016b. Yeast diversity  
836 and species recovery rates from beech forest soils. *Mycol. Prog.* 15, 845–859.  
837 <https://doi.org/10.1007/s11557-016-1206-8>
- 838
